# Supplementary material for: Safeguarding human–wildlife cooperation
Source: PubMed Central journal article supplement (PMC9540276; doi:10.1111/conl.12886), 2022-06-09
Supplement: CONL-15-e12886-s001.pdf [file CONL-15-e12886-s001.pdf]

## Supplementary Material

**Table S1:** Documented active and inactive cases of human-wildlife cooperation, either from published literature or through personal observation by authors on this paper.

| Human-wildlife cooperation | Non-human animal species                                                                           | Human cultural group                    | Location                                                | Prey species      | Status and period                                                     | References                                                                                                                                                                                                                                                     |
|----------------------------|----------------------------------------------------------------------------------------------------|-----------------------------------------|---------------------------------------------------------|-------------------|-----------------------------------------------------------------------|----------------------------------------------------------------------------------------------------------------------------------------------------------------------------------------------------------------------------------------------------------------|
| Human-dolphin              | Lahille's bottlenose dolphin ( <i>Tursiops truncatus gephyreus</i> or <i>Tursiops gephyreus</i> )* | Artisanal Brazilian net-casting fishers | Araranguá, Santa Catarina, southern Brazil              | Mainly Mugilidae  | Inactive, ~ 1900–1991                                                 | (Simões-Lopes, 1991)                                                                                                                                                                                                                                           |
| Human-dolphin              | Lahille's bottlenose dolphin ( <i>Tursiops truncatus gephyreus</i> or <i>Tursiops gephyreus</i> )* | Artisanal Brazilian net-casting fishers | Laguna, Santa Catarina, southern Brazil                 | Mainly Mugilidae  | Active (ca. 16 cooperative dolphins), ca. 1890–current day            | (Bezamat et al., 2018, 2019; da Rosa et al., 2020; Daura-Jorge et al., 2012, 2013; Machado et al., 2019a; b; Pellegrini et al., 2021; Peterson et al., 2008; Pryor & Lindbergh, 1990; Romeu et al., 2017; Simões-Lopes, 1991; Simões-Lopes et al., 1998, 2016) |
| Human-dolphin              | Lahille's bottlenose dolphin ( <i>Tursiops truncatus gephyreus</i> or <i>Tursiops gephyreus</i> )* | Artisanal Brazilian net-casting fishers | Rio Grande, Rio Grande do Sul, Southern Brazil          | Mainly Mugilidae  | Inactive ~ 1900–1991                                                  | (Simões-Lopes, 1991)                                                                                                                                                                                                                                           |
| Human-dolphin              | Lahille's bottlenose dolphin ( <i>Tursiops truncatus gephyreus</i> or <i>Tursiops gephyreus</i> )* | Artisanal Brazilian net-casting fishers | Torres river, Rio Grande do Sul, southern Brazil        | Mainly Mugilidae  | Active (1–2 cooperative dolphins), much reduced, ca. 1900–current day | (Gonçalves, 2018; Simões-Lopes, 1991)                                                                                                                                                                                                                          |
| Human-dolphin              | Lahille's bottlenose dolphin ( <i>Tursiops truncatus gephyreus</i> or <i>Tursiops gephyreus</i> )* | Artisanal Brazilian net-casting fishers | Tramandaí Inlet, Rio Grande do Sul, southern Brazil     | Mainly Mugilidae  | Active (ca. 12 cooperative dolphins), ca. 1900–current day.           | (Afonso, 2015; Camargo et al., 2020; Ilha et al., 2018, 2020; Santos et al., 2018; Serpa, 2019; Silva et al., 2021; Simões-Lopes, 1991; Zappes et al., 2011, I.B.M., unpubl. data)                                                                             |
| Human-dolphin              | Irrawaddy dolphin ( <i>Orcaella brevirostris</i> )                                                 | Artisanal Brazilian net-casting fishers | Ayeyarwady river, Sagaing and Mandalay Regions, Myanmar | Mainly Cyprinidae | Active (ca. 8 cooperative dolphins), at least 1878–current day        | (Anderson, 1878; Busnel, 1973; Smith et al., 2009; Thein, 1977; Tun, 2004, 2005, 2014)                                                                                                                                                                         |

| Human-wildlife cooperation | Non-human animal species                                    | Human cultural group                                         | Location                   | Prey species                                                                                                    | Status and period | References                                                 |
|----------------------------|-------------------------------------------------------------|--------------------------------------------------------------|----------------------------|-----------------------------------------------------------------------------------------------------------------|-------------------|------------------------------------------------------------|
| Human-dolphin              | Indo-Pacific bottlenose dolphin ( <i>Tursiops aduncus</i> ) | Bunjalung Aboriginal Australians using spears and hand nets  | Eastern Australia          | Mugilidae and Pomatomidae                                                                                       | Inactive          | (Clode, 2002; Fairholme, 1856; Neil, 2002; Robinson, 1965) |
| Human-orca                 | Orca ( <i>Orcinus orca</i> )                                | Yuin Aboriginal Australians, together with European settlers | Eastern Australia          | Baleen whales                                                                                                   | Inactive          | (Clode, 2002; Dakin, 1938; Mead, 1961; Neil, 2002)         |
| Human-orca                 | Orca ( <i>Orcinus orca</i> )                                | Chukchi, Siberian Yupik                                      | Chukotka, Russia           | Walrus ( <i>Odobenus rosmarus</i> ), true seal species (Phocidae), grey whales ( <i>Eschrichtius robustus</i> ) | Inactive          | (Bogoras, 1907; Holzlehner, 2015)                          |
| Human-honeyguide           | Greater honeyguide ( <i>Indicator indicator</i> )           | Diverse backgrounds                                          | Central Cameroon           | Honeybee ( <i>Apis mellifera</i> )                                                                              | Inactive          | (Gruber, 2018; Gruber & Sanda, 2019)                       |
| Human-honeyguide           | Greater honeyguide ( <i>Indicator indicator</i> )           | Unknown                                                      | Central Mozambique         | Honeybee ( <i>Apis mellifera</i> )                                                                              | Active            | (dos Santos, 1609)                                         |
| Human-honeyguide           | Greater honeyguide ( <i>Indicator indicator</i> )           | Unknown                                                      | Congo Basin                | Honeybee ( <i>Apis mellifera</i> )                                                                              | Likely inactive   | (Chapin, 1939; Friedmann, 1955; Merolla da Sorrento, 1744) |
| Human-honeyguide           | Greater honeyguide ( <i>Indicator indicator</i> )           | Xhosa                                                        | Eastern Cape, South Africa | Honeybee ( <i>Apis mellifera</i> )                                                                              | Inactive          | (Friedmann, 1955; Skead, 1951)                             |
| Human-honeyguide           | Greater honeyguide ( <i>Indicator indicator</i> )           | Swazi                                                        | Kingdom of Eswatini        | Honeybee ( <i>Apis mellifera</i> )                                                                              | Active            | (G.S.D, unpubl. data)                                      |
| Human-honeyguide           | Greater honeyguide ( <i>Indicator indicator</i> )           | Awer                                                         | Lamu County, Kenya         | Honeybee ( <i>Apis mellifera</i> )                                                                              | Active            | (van der Wal <i>et al.</i> , 2022)                         |

| Human-wildlife cooperation | Non-human animal species                          | Human cultural group | Location                                    | Prey species                                                                                   | Status and period                          | References                                                                                      |
|----------------------------|---------------------------------------------------|----------------------|---------------------------------------------|------------------------------------------------------------------------------------------------|--------------------------------------------|-------------------------------------------------------------------------------------------------|
| Human-honeyguide           | Greater honeyguide ( <i>Indicator indicator</i> ) | Yao                  | Niassa Special Reserve, Northern Mozambique | Honeybee ( <i>Apis mellifera</i> ), meliponine stingless bee species                           | Active                                     | (Spottiswoode et al., 2016)                                                                     |
| Human-honeyguide           | Greater honeyguide ( <i>Indicator indicator</i> ) | Boran                | Northern Kenya                              | Honeybee ( <i>Apis mellifera</i> )                                                             | Active,                                    | (Isack, 1987, 1999; Isack & Reyer, 1989)                                                        |
| Human-honeyguide           | Greater honeyguide ( <i>Indicator indicator</i> ) | Hadzabe              | Northern Tanzania                           | Honeybee ( <i>Apis mellifera</i> ), rarely meliponine stingless bee species                    | Active                                     | (Laltaika, 2021; Marlowe et al., 2014; Wood et al., 2014)                                       |
| Human-honeyguide           | Greater honeyguide ( <i>Indicator indicator</i> ) | Ndorobo              | Northern Tanzania                           | Honeybee ( <i>Apis mellifera</i> )                                                             | Active                                     | (Laltaika, 2021; Queeny, 1952)                                                                  |
| Human-honeyguide           | Greater honeyguide ( <i>Indicator indicator</i> ) | Sonjo                | Northern Tanzania                           | Honeybee ( <i>Apis mellifera</i> )                                                             | Active                                     | (Laltaika, 2021)                                                                                |
| Human-honeyguide           | Greater honeyguide ( <i>Indicator indicator</i> ) | Maasai               | Northern Tanzania                           | Honeybee ( <i>Apis mellifera</i> )                                                             | Active                                     | (Laltaika, 2021)                                                                                |
| Human-honeyguide           | Greater honeyguide ( <i>Indicator indicator</i> ) | Unknown              | Present-day Ethiopia                        | Honeybee ( <i>Apis mellifera</i> )                                                             | Unknown                                    | (Friedmann, 1955; Lobo, 1789)                                                                   |
| Human-honeyguide           | Greater honeyguide ( <i>Indicator indicator</i> ) | Unknown              | Present-day Guinea                          | Honeybee ( <i>Apis mellifera</i> )                                                             | Likely inactive                            | (Friedmann, 1955; Ludolphus, 1682)                                                              |
| Human-honeyguide           | Greater honeyguide ( <i>Indicator indicator</i> ) | Waata                | Tsavo, southern Kenya                       | Honeybee ( <i>Apis mellifera</i> )                                                             | Unknown                                    | (Ville, 1995)                                                                                   |
| Human-honeyguide           | Greater honeyguide ( <i>Indicator indicator</i> ) | Khoe-Sān             | Western Cape, South Africa                  | Honeybee ( <i>Apis mellifera</i> )                                                             | Inactive                                   | (Sparrman, 1777)                                                                                |
| Human-wolf                 | Wolf ( <i>Canis lupus</i> )                       | Indigenous Americans | North America                               | Various ungulates, including bison ( <i>Bison bison</i> ) and elk ( <i>Cervus Canadensis</i> ) | Inactive, possibly active in limited areas | (Barsh & Marlor, 2003; Fogg et al., 2015; Marshall, 1995; Pierotti & Fogg, 2017; Shipman, 2015) |

\* There is an ongoing taxonomic debate on Lahille's bottlenose dolphin should be considered a species (*Tursiops gephyreus*) or a subspecies (*Tursiops truncatus gephyreus*) (e.g., Wang et al., 2021; Wickert et al., 2016)

**Table S2** Documented active and inactive cases of human-wildlife interactions that are potential mutualistic and/or cooperative, or that are mutualistic but not cooperative. Based on published literature or through personal observation by authors on this paper.

| Assessment                       | Human-wildlife interaction | Wild animal species                                                 | Human cultural group                                      | Location                       | Prey species                                      | Status and period                     | Notes                                                             | References                                                         |
|----------------------------------|----------------------------|---------------------------------------------------------------------|-----------------------------------------------------------|--------------------------------|---------------------------------------------------|---------------------------------------|-------------------------------------------------------------------|--------------------------------------------------------------------|
| Mutualism; no cooperation        | Human-dolphin              | Guiana dolphin ( <i>Sotalia guianensis</i> )                        | Artisanal Brazilian fishers using unsupervised stake nets | Cananéia, south-eastern Brazil | Mainly Mugilidae                                  | Active, 1982–current day              | The use of stake-nets indicates no real-time coordination         | (Louzada, 2013; Monteiro-Filho, 1995; Monteiro-Filho et al., 2018) |
| Potential mutualism/parasitism   | Human-dolphin              | Guiana dolphin ( <i>Sotalia guianensis</i> )                        | Brazilian net-casting fishers                             | Guaratuba southern Brazil      | Unknown                                           | Inactive, unknown start date          | Not enough details to indicate dolphins benefit                   | (Monteiro-Filho et al., 1999)                                      |
| Potential mutualism/parasitism   | Human-dolphin              | Amazon river dolphin ( <i>Inia geoffrensis</i> )                    | Artisanal Brazilian fishers                               | Manaus                         | Unknown                                           | Inactive, unknown start date—ca. 1954 | Not enough details to indicate dolphins benefit                   | (Busnel, 1973; Lamb, 1954)                                         |
| Potential mutualism/parasitism   | Human-dolphin              | Indo-Pacific humpback dolphin ( <i>Sousa chinensis</i> )            | Ashtamudi artisanal fishers                               | Ashtamudi, south-western India | Mainly Mugilidae                                  | Active, unknown start date            | Not enough details to indicate dolphins benefit                   | (Kumar et al., 2012)                                               |
| Mutualism; no cooperation        | Human-dolphin              | Irrawaddy dolphin ( <i>Orcaella brevirostris</i> )                  | Chilika artisanal fishers using unsupervised stake nets   | Chilika, eastern India         | Mainly Mugilidae                                  | Active, unknown start date            | The use of stake-nets indicates no real-time coordination         | (D’Lima et al., 2014)                                              |
| Potential mutualism/parasitism   | Human-dolphin              | South Asian river dolphin ( <i>Platanista gangetica gangetica</i> ) | Artisanal fishers                                         | Sundarbans, Bangladesh         | Mugilidae and other small fish and shrimp species | Active, unknown start date            | It seems unlikely that dolphins benefit, probably not mutualistic | (Deb, 2015)                                                        |
| Mutualism; potential cooperation | Human-dolphin              | Common bottlenose dolphin ( <i>Tursiops truncatus</i> )             | Imragen fishers using spears and hand nets                | El-Memghar, Mauritania         | Mainly Mugilidae                                  | Potential active                      | Not enough details to indicate there is coordination              | (Busnel, 1973; Campredon & Cuq, 2001)                              |

| Assessment                       | Human-wildlife interaction | Wild animal species                                | Human cultural group                       | Location                                               | Prey species                                                                                                 | Status and period                     | Notes                                                | References                                                 |
|----------------------------------|----------------------------|----------------------------------------------------|--------------------------------------------|--------------------------------------------------------|--------------------------------------------------------------------------------------------------------------|---------------------------------------|------------------------------------------------------|------------------------------------------------------------|
| Mutualism; potential cooperation | Human-dolphin              | Atlantic humpback dolphin ( <i>Sousa teuszii</i> ) | Imragen fishers using spears and hand nets | El-Memghar, Mauritania                                 | Mainly Mugilidae                                                                                             | Unknown                               | Not enough details to indicate there is coordination | (Busnel, 1973)                                             |
| Mutualism; potential cooperation | Human-dolphin              | Unknown dolphin species                            | Unknown                                    | Iasos gulf, present-day Turkey                         | Unknown                                                                                                      | Inactive, unknown start and end dates | Not enough details to indicate there is coordination | (Orams, 1997; Ridgway, 1970; Stebbins, 1929; Turgut, 2010) |
| Mutualism; potential cooperation | Human-dolphin              | Unknown dolphin species                            | Artisanal fishers                          | Montpellier, present-day France                        | Mainly Mugilidae                                                                                             | Inactive, unknown start and end dates | Not enough details to indicate there is coordination | (Pliny the Elder. A.D. 23-79, 1940)                        |
| Mutualism; potential cooperation | Human-dolphin              | Unknown dolphin species                            | Unknown                                    | Palomos gulf, present-day Spain                        | Unknown                                                                                                      | Inactive, unknown start and end dates | Not enough details to indicate there is coordination | (Orams, 1997; Ridgway, 1970; Stebbins, 1929; Turgut, 2010) |
| Potential mutualism              | Human-orca                 | Orca ( <i>Orcinus orca</i> )                       | Gilyak, Nivkhy                             | Kamchatka, Russia                                      | Walruses ( <i>Obobenus rosmarus</i> ), seal species (Phocidae), grey whales ( <i>Eschrichtius robustus</i> ) | Inactive                              | Not enough details to indicate orcas benefit         | (Jochelson, 1908; Shternberg, 1933)                        |
| Potential mutualism              | Human-orca                 | Orca ( <i>Orcinus orca</i> )                       | Yamana, Selknam                            | Cape Horn, Patagonia                                   | Baleen whales (Mysticeti)                                                                                    | Inactive                              | Not enough details to indicate orcas benefit         | (Bogoras, 1907; Chapman, 1997, 2010)                       |
| Mutualism; potential cooperation | Human-orca                 | Orca ( <i>Orcinus orca</i> )                       | Nunavut Inuit                              | Western Hudson Bay (Kangiqsualuk ilua), central Canada | Narwhal, Beluga, Bowhead ( <i>Balaena mysticetus</i> ), seals                                                | Inactive                              | Not enough details to indicate there is coordination | (Westdal et al., 2017)                                     |
| Potential mutualism              | Human-honeyguide           | Lesser honeyguide ( <i>Indicator minor</i> )       | Baka                                       | Congo Basin                                            | Honeybee ( <i>Apis mellifera</i> )                                                                           | Unknown                               | Not enough details available to confirm mutualism    | (Brisson, 2010; Dounias, 2018)                             |

| Assessment                | Human-wildlife interaction | Wild animal species                                       | Human cultural group | Location                                | Prey species                                           | Status and period                                  | Notes                                             | References                                                              |
|---------------------------|----------------------------|-----------------------------------------------------------|----------------------|-----------------------------------------|--------------------------------------------------------|----------------------------------------------------|---------------------------------------------------|-------------------------------------------------------------------------|
| Potential mutualism       | Human-honeyguide           | Dwarf honeyguide ( <i>Indicator pumilio</i> )             | Batwa                | South-western Uganda                    | Stingless bee species (probably meliponine)            | Unknown                                            | Not enough details available to confirm mutualism | (Kajobe & Roubik, 2007)                                                 |
| Potential mutualism       | Human-honeyguide           | Scaly-throated honeyguide ( <i>Indicator variegatus</i> ) | Unknown              | Several places in South and East Africa | Honeybee ( <i>Apis mellifera</i> )                     | Unknown                                            | Not enough details available to confirm mutualism | (Friedmann, 1955; Ivy, 1901)                                            |
| Potential mutualism       | Human-wolf                 | Wolf ( <i>Canis lupus</i> )                               | Diverse backgrounds  | Several places in Europe                | Ungulates                                              | Inactive, c.a. 32,000 years ago (late Pleistocene) | Not enough details available to confirm mutualism | (Crockford & Kuzmin, 2012; Germonpré et al., 2009; Ovodov et al., 2011) |
| Potential mutualism       | Human-wolf                 | Wolf ( <i>Canis lupus</i> )                               | Ainu                 | Hokkaido, Japan                         | Sika deer ( <i>Cervus nippon</i> )                     | Inactive, 18 <sup>th</sup> century                 | Not enough details available to confirm mutualism | (Walker, 2005)                                                          |
| Mutualism; no cooperation | Human-wolf                 | Wolf ( <i>Canis lupus</i> )                               | Koyukon              | Alaska                                  | Ungulates                                              | Potentially active                                 | Possibly a mutualism, but not a cooperative one   | (Nelson, 1983)                                                          |
| Potential mutualism       | Human-corvid               | Common ravens ( <i>Corvus corax</i> )                     | Diverse backgrounds  | North America, Europe and Arctic        | Ungulates                                              | Potentially active                                 | Not enough details available to confirm mutualism | (Freuchen & Solomonsen, 1958; Heinrich, 1999)                           |
| Potential mutualism       | Human-corvid               | New Caledonian crows ( <i>Corvus moneduloides</i> )       | Kanak                | New Caledonia                           | Longhorn beetle larvae ( <i>Agrianome fairmairei</i> ) | Potentially active                                 | Not enough details available to confirm mutualism | (N.T.U., unpubl. data)                                                  |

**Table S3:** Causes of decline and loss for active and inactive forms of human-wildlife cooperation, respectively. Text is reproduced from Fig. 2 in main text, here with associated references.

|                                           | <b>Human-dolphin cooperation</b>                                                                                                                                                                                                                                                                                                         | <b>Human-honeyguide cooperation</b>                                                                                                                                                                   | <b>Human-orca cooperation</b>                                                          | <b>Human-wolf cooperation</b>                                                                                                                                          |
|-------------------------------------------|------------------------------------------------------------------------------------------------------------------------------------------------------------------------------------------------------------------------------------------------------------------------------------------------------------------------------------------|-------------------------------------------------------------------------------------------------------------------------------------------------------------------------------------------------------|----------------------------------------------------------------------------------------|------------------------------------------------------------------------------------------------------------------------------------------------------------------------|
| <b>Human partner</b>                      | Alternative fisheries or sources of income, urban encroachment<br><br><i>(Campredon &amp; Cuq, 2001; D’Lima et al., 2014; Ilha et al., 2020; Machado et al., 2019b; Peterson et al., 2008; Santos-Silva et al., 2022; Smith et al., 2009; Tun, 2004, 2014; Zappes et al., 2011)</i>                                                      | Changing livelihoods (incl. beekeeping), other sugar sources, displacement from national parks<br><br><i>(Dean et al., 1990; Gruber, 2018; Isack, 1999; Laltaika, 2021; van der Wal et al., 2022)</i> | Displacement by settlers, changing livelihoods<br><br><i>(Clode, 2002; Neil, 2002)</i> | Displacement and extermination by settlers<br><br><i>(Barsh &amp; Marlor, 2003; Fogg et al., 2015; Marshall, 1995; Pierotti &amp; Fogg, 2017; Standing Bear, 1978)</i> |
| <b>Wildlife partner</b>                   | Human-induced risk and mortality (bycatch, habitat degradation or loss, noise, pollution)<br><br><i>(Agrelo et al., 2019; Bezamat et al., 2021; Camargo et al., 2020; Campredon &amp; Cuq, 2001; Daura-Jorge et al., 2013; Pellegrini et al., 2021; Righetti et al., 2019; Smith et al., 2009; Tun, 2004, 2014; Zappes et al., 2011)</i> | Potentially deforestation affecting certain host species<br><br><i>(C.N.S., unpubl. data)</i>                                                                                                         | Injury or killing of orcas by humans<br><br><i>(Clode, 2002; Neil, 2002)</i>           | Hunting of wolves by settlers<br><br><i>(Fogg et al., 2015; Standing Bear, 1978)</i>                                                                                   |
| <b>Suitable environment</b>               | Industrial overfishing, pollution<br><br><i>(Agrelo et al., 2019; Camargo et al., 2020; de Abreu-Mota et al., 2018; Pellegrini et al., 2021; Righetti et al., 2019; Santos et al., 2018; Tun, 2004, 2014; Zappes et al., 2011)</i>                                                                                                       | Droughts affecting bees, deforestation near urban areas<br><br><i>(Gruber, 2018; Gruber &amp; Sanda, 2019; Laltaika, 2021; van der Wal et al., 2022)</i>                                              | Hunting of whales and other prey<br><br><i>(Clode, 2002)</i>                           | Extermination of ungulates by settlers<br><br><i>(Fogg et al., 2015; Standing Bear, 1978)</i>                                                                          |
| <b>Compatible inter-species knowledge</b> | Fewer interested youth, loss of skilled demonstrators in both species<br><br><i>(Catão &amp; Barbosa, 2018; da Rosa et al., 2020)</i>                                                                                                                                                                                                    | Fewer interested youth, loss of skilled demonstrators in both species<br><br><i>(Isack, 1999; Laltaika, 2021; van der Wal et al., 2022)</i>                                                           | Potential skilled demonstrators killed by outsiders<br><br><i>(Clode, 2002)</i>        | Fear of humans in wolves, loss of opportunity for humans to learn skills<br><br><i>(Pierotti &amp; Fogg, 2017)</i>                                                     |

## References Supplementary Material

- Afonso, G. S. (2015). *Influência das atividades antrópicas em uma população de botos (Tursiops Gervais, 1855) residente do Litoral Norte do Rio Grande do Sul, Brasil*. Instituto de Biociências; Universidade Federal do Rio Grande do Sul.
- Agrelo, M., Daura-Jorge, F. G., Bezamat, C., Silveira, T. C. L., Volkmer de Castilho, P., Rodrigues Pires, J. S., & Simões-Lopes, P. C. (2019). Spatial behavioural response of coastal bottlenose dolphins to habitat disturbance in southern Brazil. *Aquatic Conservation: Marine and Freshwater Ecosystems*, 29(11), 1949–1958. <https://doi.org/10.1002/aqc.3188>
- Anderson, J. (1878). *Anatomical and Zoological Researches: Comprising an Account of the Zoological Results of the Two Expeditions to Western Yunnan in 1868 and 1875; and A Monograph of the Two Cetacean Genera, Platanista and Orcella[sic]*. Bernard Quaritch.
- Barsh, R. L., & Marlor, C. P. (2003). Driving bison and Blackfoot science. *Human Ecology*, 31, 571–593.
- Bezamat, C., Castilho, P. V., Simões-Lopes, P. C., Ingram, S. N., & Daura-Jorge, F. G. (2019). Reproductive parameters and factors influencing calf survival of bottlenose dolphins that engage in a unique foraging cooperation with fishermen. *Marine Biology*, 167(1), 5.
- Bezamat, C., Hammond, P. S., Castilho, P. V., Simões-Lopes, P. C., & Daura-Jorge, F. G. (2021). Dolphin population specialized in foraging with artisanal fishers requires zero-bycatch management to persist. *Aquatic Conservation: Marine and Freshwater Ecosystems*, 1–13.
- Bezamat, C., Simões-Lopes, P. C., Castilho, P. V., & Daura-Jorge, F. G. (2018). The influence of cooperative foraging with fishermen on the dynamics of a bottlenose dolphin population. *Marine Mammal Science*, 35(3), 825–842. <https://doi.org/10.1111/mms.12565>
- Bogoras, W. (1907). *Part II. The Chukchee: Religion. Memoirs of the American Museum of Natural History, Vol XI*. G.E. Stechert & Co.
- Brisson, R. (2010). *Petit dictionnaire baka-français*. Editions L'Harmattan.
- Busnel, R. G. (1973). Symbiotic relationship between man and dolphins. *Transactions of the New York Academy of Sciences*, 2, 112–131.
- Camargo, Y. R., Dal Forno, M., Dorneles, D. R., Frainer, G., Ilha, E. B., Rigon, C. T., Santos, B., Santos, M. L., Serpa, N., Simas, T. P., Carlos, C. J., & Moreno, I. B. (2020). Diagnóstico ambiental do estuário do rio Tramandaí, litoral norte do Rio Grande do Sul, Brasil. *Revista CEPSUL - Biodiversidade e Conservação Marinha*, 9, e2020002. <https://doi.org/10.37002/revistacepsul.vol9.1625e2020002>
- Campredon, P., & Cuq, F. (2001). Artisanal fishing and coastal conservation in West Africa. *Journal of Coastal Conservation*, 7(1), 91–100. <https://doi.org/10.1007/BF02742471>
- Catão, B., & Barbosa, G. C. (2018). "Good dolphins", fishes and fishermen: about the conjoint fishing in Laguna (Santa Catarina, Brazil). *Revista Do Instituto de Estudos Brasileiros*, 69, 205–225.
- Chapin, J. P. (1939). The birds of the Belgian Congo. *Bulletin of the American Museum of Natural History*, 550.
- Chapman, A. (1997). The Great Ceremonies of the Selk'nam and the Yamana: A Comparative Analysis. In C. McEwan (Ed.), *Patagonia: natural history, prehistory and ethnography at the uttermost end of the earth*. Princeton University Press.
- Chapman, A. (2010). *European Encounters with the Yamana People of Cape Horn, Before and After Darwin*. Cambridge University Press.
- Clode, D. (2002). *Killers in Eden: The True Story of Killer Whales and Their Remarkable Partnership with the Whalers of Twofold Bay*. Allen & Unwin.
- Crockford, S. J., & Kuzmin, Y. V. (2012). Comments on Germonpré et al., *Journal of Archaeological Science* 36, 2009 "Fossil dogs and wolves from Palaeolithic sites in Belgium, the Ukraine and Russia: Osteometry, ancient DNA and stable isotopes", and Germonpre, Lazkickova-Galetova, and Germonpre, L. *Journal of Archaeological Science*, 39(8), 2797–2801. <https://doi.org/10.1016/j.jas.2012.04.033>
- D'Lima, C., Marsh, H., Hamann, M., Sinha, A., & Arthur, R. (2014). Positive interactions between Irrawaddy dolphins and artisanal fishers in the Chilika Lagoon of Eastern India are driven by ecology, socioeconomics, and culture. *Ambio*, 43(5), 614–624. <https://doi.org/10.1007/s13280->



013-0440-4

- da Rosa, D. S. X., Hanazaki, N., Cantor, M., Simões-Lopes, P. C., & Daura-Jorge, F. G. (2020). The ability of artisanal fishers to recognize the dolphins they cooperate with. *Journal of Ethnobiology and Ethnomedicine*, 16(1), 1–11. <https://doi.org/10.1186/s13002-020-00383-3>
- Dakin, W. J. (1938). *Whalemen Adventurers: The Story of Whaling in Australian Waters and Other Southern Seas Related Thereto, from the Days of Sails to Modern Times*. Angus & Robertson.
- Daura-Jorge, F. G., Cantor, M., Ingram, S. N., Lusseau, D., & Simões-Lopes, P. C. (2012). The structure of a bottlenose dolphin society is coupled to a unique foraging cooperation with artisanal fishermen. *Biology Letters*, 8(5), 702–705. <https://doi.org/10.1098/rsbl.2012.0174>
- Daura-Jorge, F. G., Ingram, S. N., & Simões-Lopes, P. C. (2013). Seasonal abundance and adult survival of bottlenose dolphins (*Tursiops truncatus*) in a community that cooperatively forages with fishermen in southern Brazil. *Marine Mammal Science*, 29(2), 293–311. <https://doi.org/10.1111/j.1748-7692.2012.00571.x>
- de Abreu-Mota, M. A., Medeiros, R. P., & Noernberg, M. A. (2018). Resilience thinking applied to fisheries management: perspectives for the mullet fishery in Southern-Southeastern Brazil. *Regional Environmental Change*, 18(7), 2047–2058. <https://doi.org/10.1007/s10113-018-1323-9>
- Dean, W. R. J., Siegfried, W. R., & MacDonald, I. A. W. (1990). The fallacy, fact, and fate of guiding behavior in the greater honeyguide. *Conservation Biology*, 4(1), 99–101. <https://doi.org/10.1111/j.1523-1739.1990.tb00272.x>
- Deb, A. K. (2015). "Something sacred, something secret": traditional ecological knowledge of the artisanal coastal fishers of Bangladesh. *Journal of Ethnobiology*, 35(3), 536–565. <https://doi.org/10.2993/etbi-35-03-536-565.1>
- dos Santos, J. (1609). *Ethiopia Oriental (Convento de S. Domingo de Évora, Évora)*.
- Dounias, E. (2018). Cooperating with the wild: past and present auxiliary animals assisting humans in their foraging activities. In C. Stépanoff & J. D. Vigne (Eds.), *Hybrid communities. Biosocial approaches to domestication and other trans-species relationships*. (pp. 197–220). Routledge.
- Fairholme, J. K. E. (1856). The blacks of Moreton bay and the porpoises. *Zoological Society of London, Proceedings*, 11(497–498).
- Fogg, B. R., Howe, N., & Pierotti, R. (2015). Relationships between indigenous American peoples and wolves 1: wolves as teachers and guides. *Journal of Ethnobiology*, 35(2), 262–285. <https://doi.org/10.2993/etbi-35-02-262-285.1>
- Freuchen, P., & Solomonsen, F. (1958). *The Arctic Year*. Jonathan Cape.
- Friedmann, H. (1955). The honey-guides. *Bulletin of the United States National Museum*, 208, 1–292. <https://doi.org/10.5479/si.03629236.208.1>
- Germonpré, M., Sablin, M., & Stevens, R. (2009). Fossil dogs and wolves from Paleolithic sites in Belgium, the Ukraine and Russia: osteometry, ancient DNA and stable Isotopes. *Journal of Archaeological Science*, 36, 473–490.
- Gonçalves, Y. C. (2018). A visão dos pescadores artesanais sobre a pesca cooperativa e a importância dos Botos, *tursiops truncatus* (MONTAGU, 1821), em dois estuários do sul do Brasil. BSc thesis. In *Universidade Federal do Rio Grande do Sul*.
- Gruber, M. (2018). Hunters and guides: multispecies encounters between humans, honeyguide birds and honeybees. *African Study Monographs*, 39(4), 169–187. <https://doi.org/10.14989/236670>
- Gruber, M., & Sanda, M. (2019). *Honey Hunting and Beekeeping in Adamaoua (Cameroon)*. Rüdiger Köppe Verlag.
- Heinrich, B. (1999). *Mind of the Raven*. Harper Collins.
- Holzlehner, T. (2015). Werewolves of the Sea: Human-Killer Whale (*orcinus orca*) relationship in the North Pacific. XI. *Conference on Hunting and Gathering Societies, September 7-11, Vienna, Austria*.
- Ilha, E. B., Rigon, C. T., Dorneles, D. R., De Camargo, Y. R., Kindel, E. A. I., & Moreno, I. B. (2020). Pescadores e botos: histórias de uma conexão em rede. *Ambiente & Educação*, 25(2), 512–535. <https://doi.org/10.14295/ambeduc.v25i2.8536>
- Ilha, E. B., Serpa, N. B., Heissler, V. L., Dorneles, D. R., Camargo, Y. R. De, Rigon, C. T., Gass, C. M., Calabrezi, R., Aita, E., Kindel, I., & Moreno, I. B. (2018). *Guia de apoio pedagógico para educadores:*

*interação entre pescadores, botos e tainhas: aprendizados sobre cooperação, tradição e cultura.* UFRGS.

- Isack, H. A. (1987). *The biology of the greater honeyguide Indicator indicator, with emphasis on the guiding behaviour.* DPhil thesis, University of Oxford.
- Isack, H. A. (1999). The role of culture, traditions and local knowledge in co-operative honey-hunting between man and honeyguide: a case study of Boran community of northern Kenya. In N. J. Adams & R. H. Slotow (Eds.), *Johannesburg: BirdLife South Africa: Vol. Int. Ornith* (Issue eds Adams; N.J. & Slotow; R.H., pp. 1351–1357). BirdLife South Africa.  
[https://www.internationalornithology.org/PROCEEDINGS\\_Durban/Symposium/S23/S23.4.htm](https://www.internationalornithology.org/PROCEEDINGS_Durban/Symposium/S23/S23.4.htm)
- Isack, H. A., & Reyer, H. U. (1989). Honeyguides and honey gatherers: interspecific communication in a symbiotic relationship. *Science*, 243(4896), 1343–1346.  
<https://doi.org/10.1126/science.243.4896.1343>
- Ivy, R. H. (1901). Notes on the nesting and other habits of some South African birds. *Ibis*, 8(1), 18–28.
- Jochelson, W. (1908). *The Koryak. The Jesup North Pacific Expedition Vol. VI.* E.J. Brill.
- Kajobe, R., & Roubik, D. (2007). Honey-making bee colony abundance and predation by apes and humans in a Uganda forest reserve. *Biotropica*, 38(2), 210–218.
- Kumar, A. B., Smrithy, R., & Sathasivam, K. (2012). Dolphin-assisted cast net fishery in the Ashtamudi Estuary, south-west coast of India. *Indian J. Fish.*, 59(3), 143–148.
- Laltaika, E. A. (2021). *Understanding the mutualistic interaction between greater honeyguides and four co-existing human cultures in northern Tanzania.* MSc thesis, University of Cape Town.
- Lamb, F. F. (1954). The fisherman's porpoise. *Natural History*, 635, 231–234.
- Lobo, J. (1789). *A voyage to Abyssinia.*
- Louzada, C. N. (2013). How do Guiana dolphin *Sotalia guianensis*, from the Cananéia estuary in State of São Paulo, use cerco-fixo fish traps in their fishing activities? *Revista de Etologia*, 12, 18–24.
- Ludolphus, J. (1682). *A new history of Ethiopia.*
- Machado, A. M. S., Cantor, M., Costa, A. P. B., Righetti, B. P. H., Bezamat, C., Valle-Pereira, J. V. S., Simões-Lopes, P. C., Castilho, P. V., & Daura-Jorge, F. G. (2019a). Homophily around specialized foraging underlies dolphin social preferences. *Biology Letters*, 15(4), 5–9.  
<https://doi.org/10.1098/rsbl.2018.0909>
- Machado, A. M. S., Daura-Jorge, F. G., Herbst, D. F., Simões-Lopes, P. C., Ingram, S. N., Castilho, P. V., & Peroni, N. (2019b). Artisanal fishers' perceptions of the ecosystem services derived from a dolphin-human cooperative fishing interaction in southern Brazil. *Ocean and Coastal Management*, 173, 148–156. <https://doi.org/10.1016/j.ocecoaman.2019.03.003>
- Marlowe, F. W., Berbesque, J. C., Wood, B. M., Crittenden, A., Porter, C., & Mabulla, A. (2014). Honey, Hadza, hunter-gatherers, and human evolution. *Journal of Human Evolution*, 71, 119–128.  
<https://doi.org/10.1016/j.jhevol.2014.03.006>
- Marshall, J. (1995). *On behalf of the wolf and the first peoples.* Red Crane.
- Mead, T. (1961). *Killers of Eden: The Story of the Killer Whales of Twofold Bay.* Angus and Robertson.
- Merolla da Sorrento, F. J. (1744). A voyage to Congo. In A. Churchill (Ed.), *A collection of voyages and travels* (pp. 521–616).
- Monteiro-Filho, E. L. A. (1995). Pesca interativa entre o golfinho *Sotalia fluviatilis guianensis* e a comunidade pesqueira da região de Cananéia. *Boletim Do Instituto de Pesca*, 222, 15–23.
- Monteiro-Filho, E. L. A., Bonin, C. A., & Rautenberg, M. (1999). Interações interespecíficas dos mamíferos marinhos da região da Baía de Guaratuba, litoral sul do Estado do Paraná. *Biotemas*, 12, 119–132.
- Monteiro-Filho, E. L. A., Deconto, L. S., Louzada, C. N., Wanderley, R. P., Godoy, D. F., & Medeiros, E. (2018). Long-term monitoring of dolphins in a large estuarine system of southeastern Brazil. In *Advances in Marine Vertebrate Research in Latin America* (pp. 15–17). Springer International Publishing.
- Neil, D. T. (2002). Cooperative fishing interactions between Aboriginal Australians and dolphins in eastern Australia. *Anthrozoös*, 15(1), 1–18. <https://doi.org/10.2752/089279302786992694>
- Nelson, R. (1983). *Make Prayers to the Raven.* University of Chicago Press.

- Orams, M. B. (1997). Historical accounts of human-dolphin interaction and recent developments in wild dolphin based tourism in Australasia. *Tourism Management*, 18(5), 317–326. [https://doi.org/10.1016/S0261-5177\(96\)00022-2](https://doi.org/10.1016/S0261-5177(96)00022-2)
- Ovodov, N. D., Crockford, S. J., Kuzmin, Y. V., Higham, T. F. G., Hodgins, G. W. L., & van der Plicht, J. (2011). A 33,000-year-old incipient dog from the Altai Mountains of Siberia: evidence of the earliest domestication disrupted by the last Glacial Maximum. *PLoS ONE*, 6(7), 4–10. <https://doi.org/10.1371/journal.pone.0022821>
- Pellegrini, A. Y., Romeu, B., Ingram, S. N., & Daura-Jorge, F. G. (2021). Boat disturbance affects the acoustic behaviour of dolphins engaged in a rare foraging cooperation with fishers. *Animal Conservation*, 1–13. <https://doi.org/10.1111/acv.12667>
- Peterson, D., Hanazaki, N., & Simões-Lopes, P. C. (2008). Natural resource appropriation in cooperative artisanal fishing between fishermen and dolphins (*Tursiops truncatus*) in Laguna, Brazil. *Ocean and Coastal Management*, 51(6), 469–475. <https://doi.org/10.1016/j.ocecoaman.2008.04.003>
- Pierotti, R., & Fogg, B. R. (2017). *The first domestication: how wolves and humans co-evolved*. Yale University Press.
- Pliny the Elder. A.D. 23-79. (1940). *Natural History* (H. Rackman, Trans.). Harvard University Press.
- Pryor, K., & Lindbergh, J. (1990). A dolphin-human fishing cooperative in Brazil. *Marine Mammal Science*, 6(1), 77–82.
- Queeny, E. M. (1952). The Wandorobo and the honeyguide. *Journal of Natural History*, 6, 392–396.
- Ridgway, B. S. (1970). Dolphins and dolphin-riders. *Archaeology*, 23, 86–95.
- Righetti, B. P. H., Mattos, J. J., Siebert, M. N., Daura Jorge, F. G., Bezamat, C., Fruet, P. F., Genoves, R. C., Taniguchi, S., da Silva, J., Montone, R. C., Simões-Lopes, P. C., Bainy, A. C. D., & Lüchmann, K. H. (2019). Biochemical and molecular biomarkers in integument biopsies of free-ranging coastal bottlenose dolphins from southern Brazil. *Chemosphere*, 225, 139–149. <https://doi.org/10.1016/j.chemosphere.2019.02.179>
- Robinson, R. E. (1965). *The man who sold his dreaming*. Currawong Publishing Co Pty Ltd.
- Romeu, B., Cantor, M., Bezamat, C., Simões-Lopes, P. C., & Daura-Jorge, F. G. (2017). Bottlenose dolphins that forage with artisanal fishermen whistle differently. *Ethology*, 123(12), 906–915. <https://doi.org/10.1111/eth.12665>
- Santos-Silva, B., Hanazaki, N., Daura-Jorge, F. G., & M., C. (2022). Social foraging can benefit artisanal fishers who interact with wild dolphins. *Behavioural Ecology and Sociobiology*, 76, 42. <https://doi.org/https://doi.org/10.1007/s00265-022-03152-2>
- Santos, M. L., Lemos, V. M., & Vieira, J. P. (2018). No mullet, no gain: cooperation between dolphins and cast net fishermen in southern Brazil. *Zoologia*, 35, 1–13. <https://doi.org/10.3897/zoologia.35.e24446>
- Serpa, N. B. (2019). *Além das raízes culturais: as habilidades de caça de golfinhos cooperativos do sul do Brasil, Porto Alegre*. MSc thesis, Universidade Federal do Rio Grande do Sul.
- Shipman, P. (2015). *The Invaders: How Humans and Their Dogs Drove Neanderthals to Extinction*. Harvard University Press.
- Shternberg, L. A. (1933). *The Gilyaks, Orochi, Negidal, Ainu: Articles and Materials*. Dal'gi.
- Silva, E., da Silveira, F. L. A., Marques, O. R., & Moreno, I. B. (2021). “A gente acostuma os olhos”: pescadores artesanais de tarrafa e botos-de-Lahille nas paisagens da Barra do Rio Tramandaí. *Desenvolvimento e Meio Ambiente*, 56, 22–45. <https://doi.org/10.5380/dma.v56i0.72636>
- Simões-Lopes, P. C. (1991). Interaction of coastal populations of *Tursiops truncatus* (Cetacea, Delphinidae) with the mullet artisanal fisheries in Southern Brazil. *Biotemas*, 4(2), 83–94.
- Simões-Lopes, P. C., Daura-Jorge, F. G., & Cantor, M. (2016). Clues of cultural transmission in cooperative foraging between artisanal fishermen and bottlenose dolphins, *Tursiops truncatus* (Cetacea: Delphinidae). *Zoologia*, 33(6), e20160107. <https://doi.org/10.1590/S1984-4689zool-20160107>
- Simões-Lopes, P. C., Fabián, M. E., & Menegheti, J. O. (1998). Dolphin interactions with the mullet artisanal fishing on southern Brazil: a qualitative and quantitative approach. *Revta Bras. Zool.*, 15(3), 709–726.

- Skead, C. J. (1951). Notes on Honeyguides in Southeast Cape Province, South Africa. *The Auk*, 68(1), 52–62.
- Smith, B. D., Than, M., Myo, A., Win, H., & Moe, T. (2009). Catch composition and conservation management of a human-dolphin cooperative cast-net fishery in the Ayeyarwady River, Myanmar. *Biological Conservation*, 142(5), 1042–1049. <https://doi.org/10.1016/j.biocon.2009.01.015>
- Sparrman, A. V. (1777). An account of a journey into Africa from the Cape of Good-Hope, and a description of a new species of cuckow. By Dr. Andreas Sparrman, of the Royal Academy of Stockholm, in a letter to Dr. John Reinhold Forster, F.R.S. Philosophical Tr. *Transactions of the Royal Society of London*, 67, 38–47.
- Spottiswoode, C. N., Begg, K. S., & Begg, C. M. (2016). Reciprocal signaling in honeyguide-human mutualism. *Science*, 353(6297), 387–389. <https://doi.org/10.1126/science.aaf4885>
- Standing Bear, L. (1978). *Land of the Spotted Eagle*. University of Nebraska Press.
- Stebbins, E. B. (1929). *The dolphin in the literature and art of Greece and Rome*. George Banta Publishing Company.
- Thein, U. T. (1977). The Burmese freshwater dolphin. *Mammalia*, 42(2), 233–234.
- Tun, T. (2004). *Irrawaddy Dolphins in Hsith - Mandalay segment of the Ayeyawady River and cooperative fishing between Irrawaddy Dolphin, Orcaella brevirostris, and castnet fishermen in Myanmar*. Report submitted to Wildlife Conservation Society.
- Tun, T. (2005). *Castnet Fisheries in Cooperation with Irrawaddy Dolphins (Ayeyawady Dolphins) at Hsethe, Myitkangyi and Myayzun Villages, Mandalay Division, in Myanmar*. Report submitted to Wildlife Conservation Society.
- Tun, T. (2014). Castnet fishing with the help of Irrawaddy Dolphin, *Orcaella brevirostris*, in Myanmar. *Proceedings of the Design Symposium on Conservation of Ecosystem (The 13th SEASTAR2000 Workshop)*, 2, 39–45.
- Turgut, M. (2010). The myth of youth Hermias and his dolphin at lasos in Caria. *Child's Nervous System*, 26(4), 407–409.
- van der Wal, J. E. M., Gedi, I. I., & Spottiswoode, C. N. (2022). Awer honey-hunting culture with greater honeyguides in coastal Kenya. *Frontiers in Conservation Science*, 2, 727479. <https://doi.org/10.3389/fcosc.2021.727479>
- Ville, J. L. (1995). The Waata of Tsavo-Galana: hunting and trading in their semi-arid coastal hinterland. *Kenya Past and Present*, 27(1), 21–27.
- Walker, B. L. (2005). *The Lost Wolves of Japan*. University of Washington Press.
- Wang, J. Y., Costa, A. P., & Jefferson, T. A. (2021). The correct name of Lahille's bottlenose dolphin, *Tursiops truncatus gephyreus* Lahille, 1908. *Marine Mammal Science*, 37(2), 696–701.
- Westdal, K. H., Higdon, J. W., & Ferguson, S. H. (2017). Attitudes of Nunavut Inuit toward Killer Whales (*Orcinus orca*). *Arctic*, 66(3), 279–290.
- Wickert, J. C., von Eye, S. M., Oliveira, L. R., & Moreno, I. B. (2016). Revalidation of *Tursiops gephyreus* Lahille, 1908 (Cetartiodactyla: Delphinidae) from the southwestern Atlantic Ocean. *Journal of Mammalogy*, 97(6), 1728–1737.
- Wood, B. M., Pontzer, H., Raichlen, D. A., & Marlowe, F. W. (2014). Mutualism and manipulation in Hadza-honeyguide interactions. *Evolution and Human Behavior*, 35(6), 540–546. <https://doi.org/10.1016/j.evolhumbehav.2014.07.007>
- Zappes, C. A., Andriolo, A., Simões-lobes, P. C., & Di Benedetto, A. P. M. (2011). 'Human-dolphin (*Tursiops truncatus* Montagu, 1821) cooperative fishery' and its influence on cast net fishing activities in Barra de Imbé/Tramandaí, Southern Brazil. *Ocean & Coastal Management*, 54, 427–432. <https://doi.org/10.1016/j.ocecoaman.2011.02.003>
